# Supplementary material for: How prolonged expression of Hunchback, a temporal transcription factor, re-wires locomotor circuits
Source: eLife journal article supplement (doi:10.7554/elife.46089), 2019-09-10
Supplement: supp [file elife-46089-supp-v1.zip]

Archive with 9 entries (9 files):
- elife_poa_e46089_Figure_1_figure_supplement_1.pdf
- elife_poa_e46089_Figure_5_figure_supplement_1.pdf
- elife_poa_e46089_Figure_2_figure_supplement_1.pdf
- elife_poa_e46089_Figure_6_figure_supplement_1.pdf
- elife_poa_e46089_Figure_9_source_data_1.docx
- elife_poa_e46089_Transparent_Reporting_File.docx
- elife_poa_e46089_Figure_2_source_data_1.docx
- elife_poa_e46089_Figure_8_source_data_1.docx
- elife_poa_e46089_Figure_5_source_data_1.docx
