# Supplementary material for: How prolonged expression of Hunchback, a temporal transcription factor, re-wires locomotor circuits
Source: eLife journal article supplement (doi:10.7554/elife.46089), 2019-09-10
Supplement: supp [file elife-46089-supp-v1.zip › elife_poa_e46089_Figure_2_source_data_1.docx]

Source Data for Figure 2 G, H, I

| Genotype | Marker | Number of values | Mean (number of cells) | Std. Deviation | Std. Error of Mean | p value |
| --- | --- | --- | --- | --- | --- | --- |
| Control | GFP+ | 17 | 39.94 | 3.544 | 0.8595 | NA |
| NB7-1>Hb | GFP+ | 20 | 41.70 | 3.948 | 0.8829 | 0.166* |
|  |  |  |  |  |  |  |
| Control | Eve+ GFP+ | 100 | 5.000 | 0.000 | 0.000 | NA |
| Control | Eve+ GFP+ | 148 | 9.959 | 2.705 | 0.2224 | <0.0001** |
|  |  |  |  |  |  |  |
| Control | Cas+ Eve- GFP+ | 23 | 13.43 | 2.212 | 0.4612 | NA |
| NB7-1>Hb | Cas+ Eve- GFP+ | 30 | 0.2667 | 0.5833 | 0.1065 | <0.0001** |

*Unpaired t test, two-tailed

**Unpaired t test, two-tailed with Welch’s correction (for un-equal Std. Deviation)
