# Supplementary material for: How prolonged expression of Hunchback, a temporal transcription factor, re-wires locomotor circuits
Source: eLife journal article supplement (doi:10.7554/elife.46089), 2019-09-10
Supplement: supp [file elife-46089-supp-v1.zip › elife_poa_e46089_Figure_6_figure_supplement_1.pdf]

## x-y-z-t calcium imaging

**A** x-y imaging area does not vary

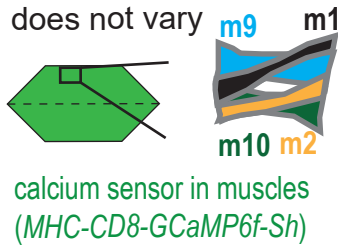

**B** acquire repeating z-stacks over time

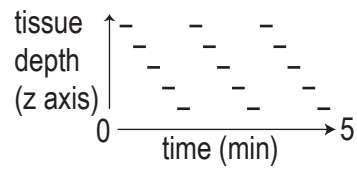

**D** time series to single  $\Delta F$  x-y image

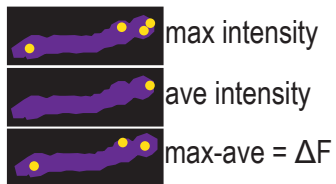

**C** z-stacks to x-y time series

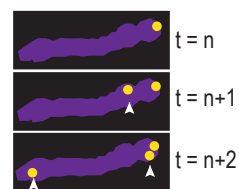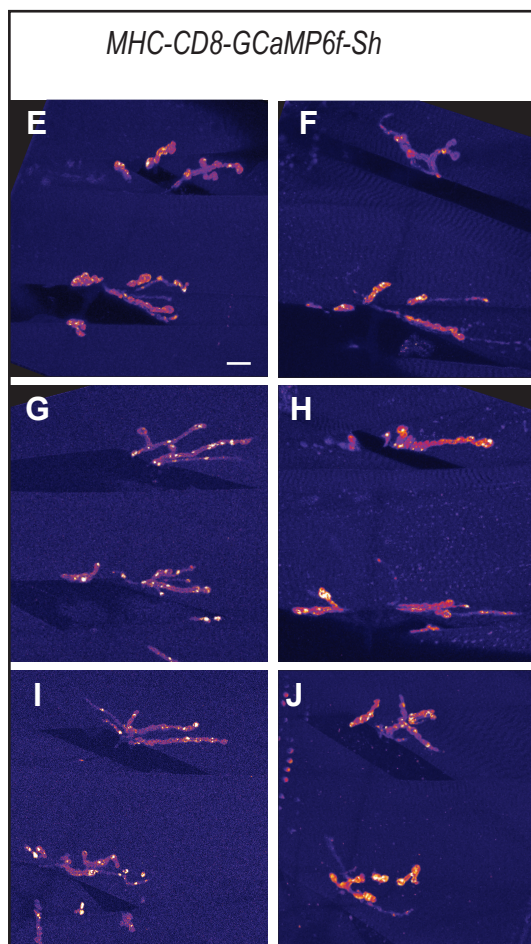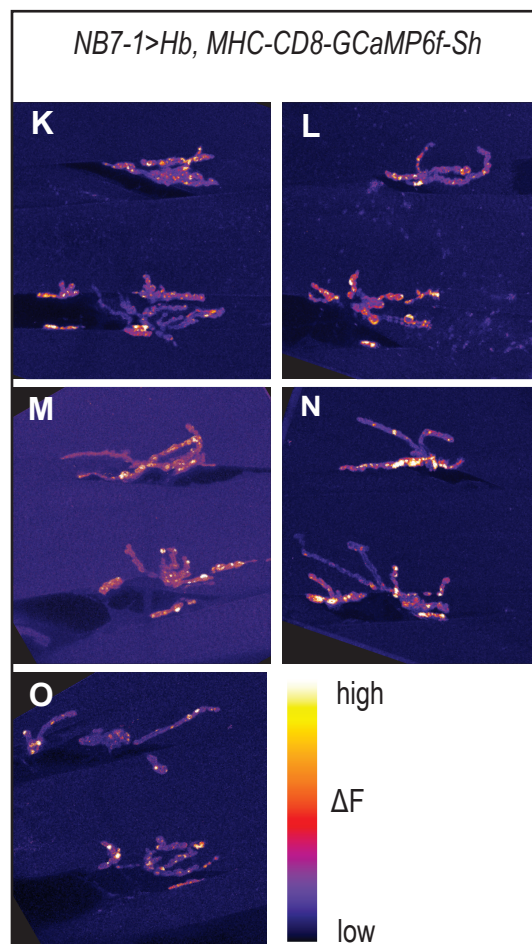

Figure 6-figure supplement 1
