# Supplementary figures and images for: How prolonged expression of Hunchback, a temporal transcription factor, re-wires locomotor circuits
Source: eLife journal article supplement (doi:10.7554/elife.46089), 2019-09-10

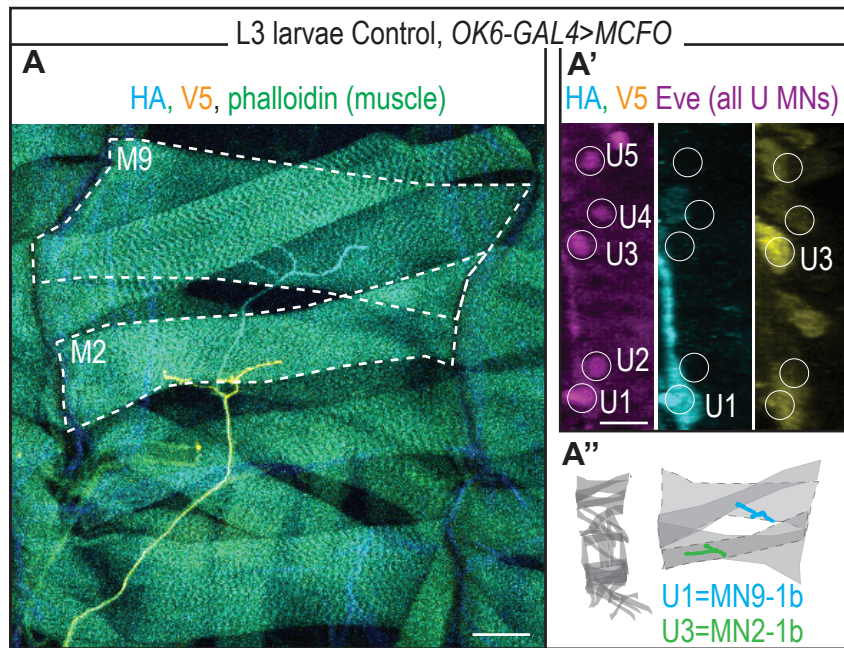

Figure 1-figure supplement 1

Supplement: supp [file elife-46089-supp-v1.zip › elife_poa_e46089_Figure_1_figure_supplement_1.pdf]

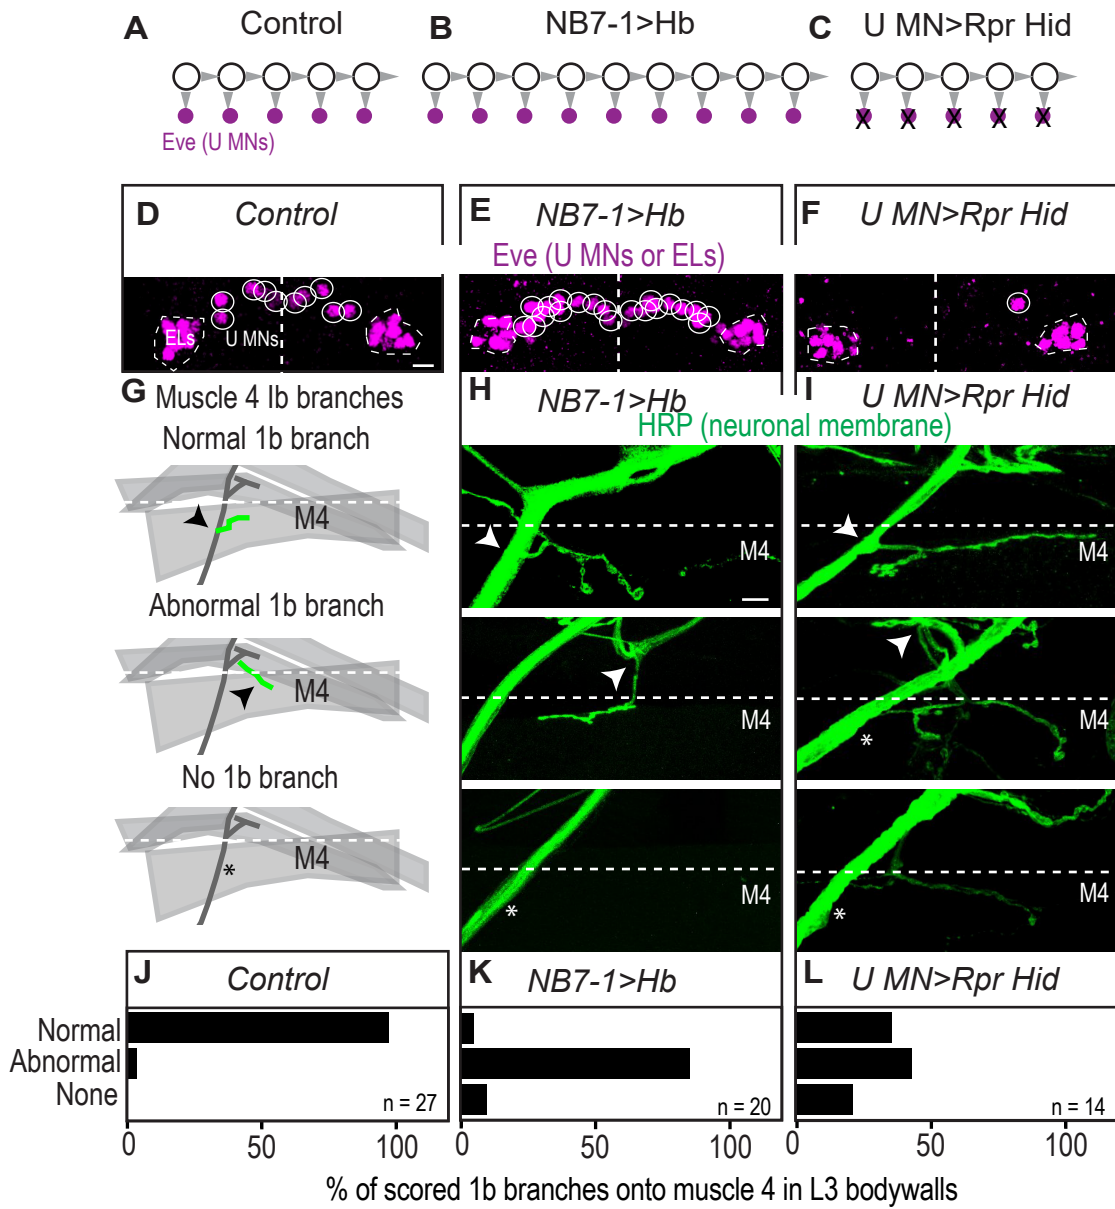

Figure 5-figure supplement 1

Supplement: supp [file elife-46089-supp-v1.zip › elife_poa_e46089_Figure_5_figure_supplement_1.pdf]

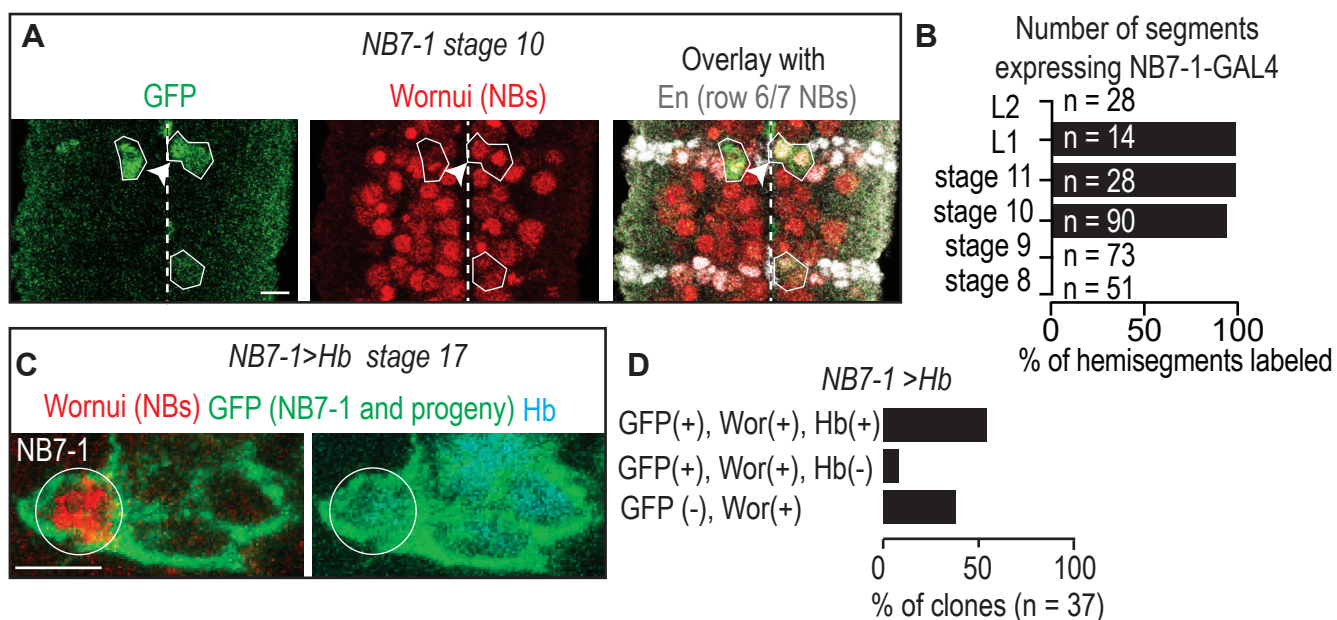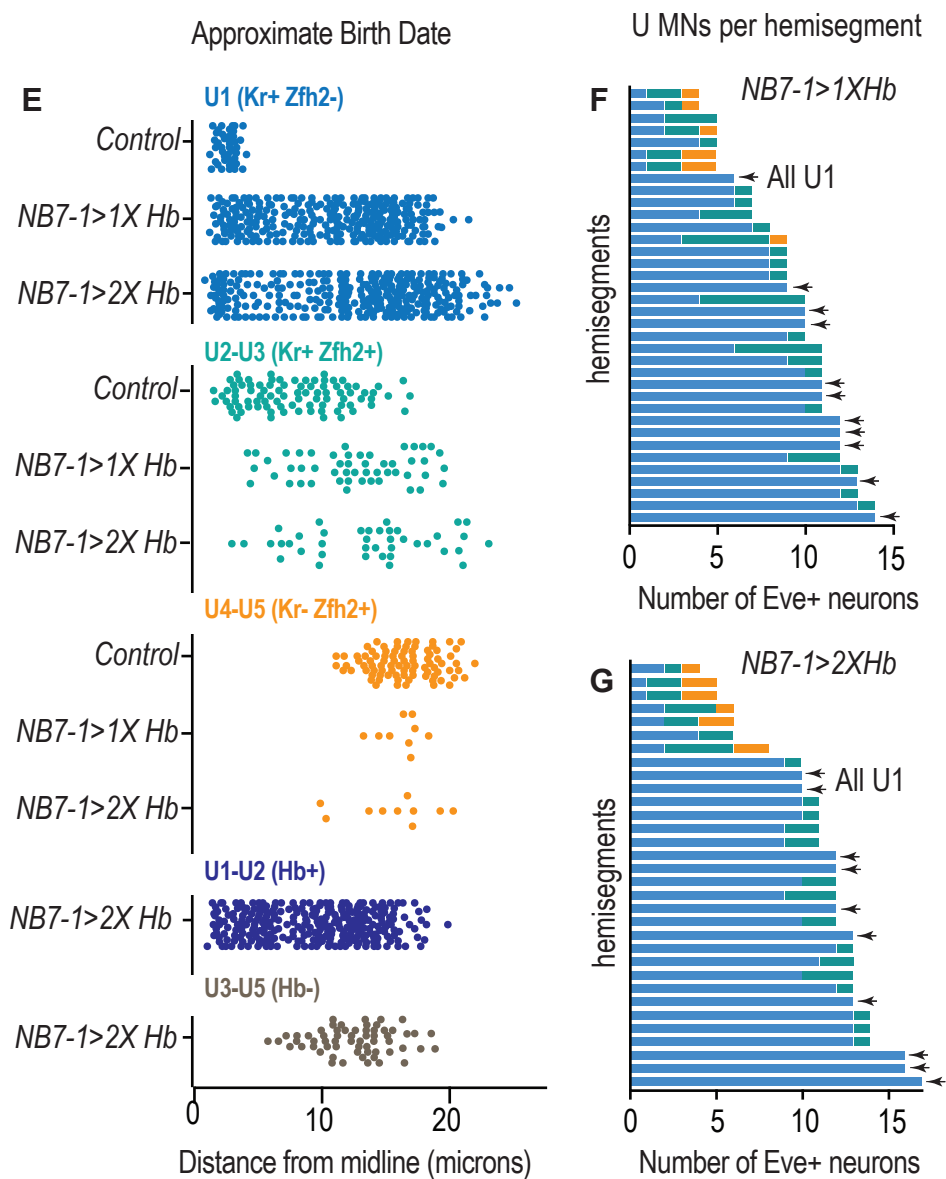

Figure 2-figure supplement 1

Supplement: supp [file elife-46089-supp-v1.zip › elife_poa_e46089_Figure_2_figure_supplement_1.pdf]
